# Supplementary material for: Chemical Variation and Implications on Repellecy Activity of Tephrosia vogelii (Hook f.) Essential Oils Against Sitophilus zeamais Motschulsky
Source: Preprints.org preprint supplement (doi:10.20944/preprints202002.0278.v1), 2020-02-19
Supplement: Supplementary file 1 [file supplementary]

**Supplementary information**

N. Kerebba a, A.O. Oyedeji b, R. Byamukama c, S.K. Kuria d, O.O. Oyedejia,⁎

*a Department of Chemistry, University of Fort Hare, P/BagX1314, Alice 5700, South Africa*

*b Department of Chemical and Physical Sciences, Walter Sisulu University, P/BagX1, Mthatha 5117, South Africa*

*c Department of Chemistry, Makerere University, P.O. Box 7062, Kampala, Uganda*

*d Department of Biological and Environmental Sciences, Walter Sisulu University, P/BagX1, Mthatha 5117, South Africa*

*Corresponding Author email: [ooyedeji@ufh.ac.za](mailto:ooyedeji@ufh.ac.za)

**Figure S1: GC- Chromatogram for the standard mixture of compounds**


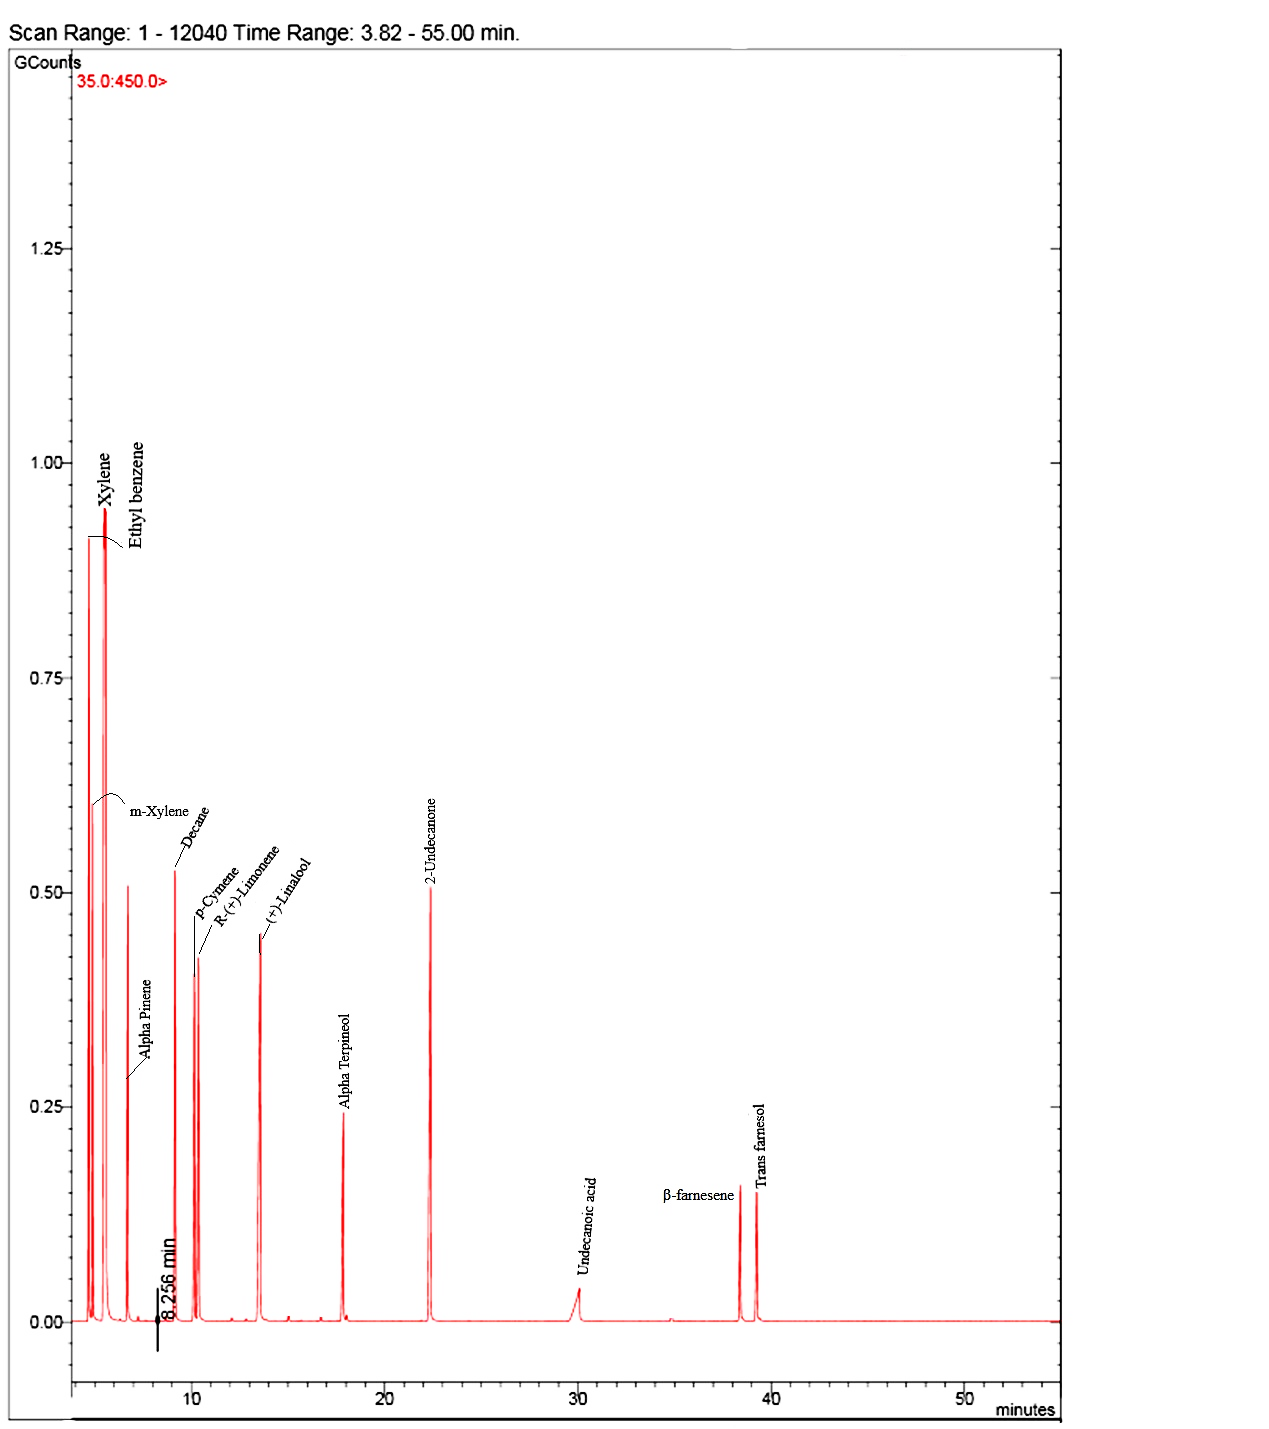


**Table S1**: Loading score of extracted principal components

|  | **Principal Component** | | | | | | | |
| --- | --- | --- | --- | --- | --- | --- | --- | --- |
| **1** | **2** | **3** | **4** | **5** | **6** | **7** | **8** |
| Ethylbenzene(EB) | .893 | .277 |  |  |  |  |  |  |
| o-Xylene(oX) | .889 | .348 |  |  |  |  |  |  |
| p-Xylene(pX) |  | .923 |  |  |  |  |  |  |
| m-Xylene(mX) | .974 |  |  |  |  |  |  |  |
| D-(+)-Alpha-pinene(αP) | .720 | .554 |  |  |  |  |  |  |
| D-limonene(Dl) |  |  |  |  |  | .932 |  |  |
| Ethanol, 2-butoxy-(E2B) | .430 | .537 |  |  |  | .248 | .282 |  |
| Linalool(Linl) | .917 |  |  |  |  |  |  |  |
| Isocaryophyllene(Icrpn) |  |  | .791 |  |  |  |  |  |
| 5,9-undecadien-2-one,6,10-dimethyl (UD) |  |  | .368 | .632 |  | .446 |  | .252 |
| (E)-Nerolidol(EN) |  |  |  |  |  |  | .233 |  |
| β-Farnesene(βF) |  |  |  | .311 |  |  |  |  |
| (-)-Spathulenol(SP) | .418 | .267 |  | .357 |  | .509 | .246 |  |
| Cis-p-metha-1(7)-8-dien-2-ol(zMD) |  |  |  |  | .961 |  |  |  |
| 1,4-dihydroxy-p-menth-2-ene (Dm) | .431 |  | .470 | .440 |  |  |  |  |
| (E,E)-Cosmene (Do) |  |  | .823 |  |  |  |  |  |
| 3-cyclohexen-1-carboxaldehyde,3,4-dimethyl(ccd) |  | .754 |  | .561 |  |  |  |  |
| Hexadecane(Hxd) | .938 |  |  |  |  |  |  |  |
| Isoaromadendrene epoxide(Isamdn) |  |  | .307 |  | .811 |  |  |  |
| β- Springene(βS) |  |  |  | .851 |  |  |  |  |
| Farnesol(Fnso) | .518 | .602 |  |  | .344 |  | .229 |  |
| α-Springene(αSp) | .248 | .230 |  |  | .239 |  | .291 | .635 |
| Farnesol(E)-methylether(FnsoEm) |  |  |  |  |  |  |  |  |

**Table S2: Pearson correlation table of major components**

| **Pearson Correlations** | | | | | | | | | | |
| --- | --- | --- | --- | --- | --- | --- | --- | --- | --- | --- |
|  | | EB | OX | pX | mX | βF | βS | Fnso | αSp | FnsoEm |
| EB | Pearson Correlation | 1 | .974** | .251 | .946** | -.215 | -.053 | .503* | .268 | .060 |
| Sig. (1-tailed) |  | .000 | .150 | .000 | .189 | .415 | .014 | .134 | .404 |
| N | 19 | 19 | 19 | 19 | 19 | 19 | 19 | 19 | 19 |
| OX | Pearson Correlation | .974** | 1 | .305 | .925** | -.248 | -.089 | .587** | .322 | .016 |
| Sig. (1-tailed) | .000 |  | .102 | .000 | .153 | .358 | .004 | .089 | .474 |
| N | 19 | 19 | 19 | 19 | 19 | 19 | 19 | 19 | 19 |
| pX | Pearson Correlation | .251 | .305 | 1 | .009 | -.107 | -.224 | .611** | .347 | -.197 |
| Sig. (1-tailed) | .150 | .102 |  | .486 | .331 | .178 | .003 | .073 | .210 |
| N | 19 | 19 | 19 | 19 | 19 | 19 | 19 | 19 | 19 |
| mX | Pearson Correlation | .946** | .925** | .009 | 1 | -.247 | -.110 | .431* | .221 | .070 |
| Sig. (1-tailed) | .000 | .000 | .486 |  | .154 | .327 | .033 | .181 | .389 |
| N | 19 | 19 | 19 | 19 | 19 | 19 | 19 | 19 | 19 |
| βF | Pearson Correlation | -.215 | -.248 | -.107 | -.247 | 1 | .253 | -.217 | .078 | -.072 |
| Sig. (1-tailed) | .189 | .153 | .331 | .154 |  | .148 | .186 | .375 | .384 |
| N | 19 | 19 | 19 | 19 | 19 | 19 | 19 | 19 | 19 |
| βS | Pearson Correlation | -.053 | -.089 | -.224 | -.110 | .253 | 1 | -.246 | -.104 | -.123 |
| Sig. (1-tailed) | .415 | .358 | .178 | .327 | .148 |  | .155 | .336 | .307 |
| N | 19 | 19 | 19 | 19 | 19 | 19 | 19 | 19 | 19 |
| Fnso | Pearson Correlation | .503* | .587** | .611** | .431* | -.217 | -.246 | 1 | .403* | -.249 |
| Sig. (1-tailed) | .014 | .004 | .003 | .033 | .186 | .155 |  | .043 | .152 |
| N | 19 | 19 | 19 | 19 | 19 | 19 | 19 | 19 | 19 |
| αSp | Pearson Correlation | .268 | .322 | .347 | .221 | .078 | -.104 | .403* | 1 | -.143 |
| Sig. (1-tailed) | .134 | .089 | .073 | .181 | .375 | .336 | .043 |  | .280 |
| N | 19 | 19 | 19 | 19 | 19 | 19 | 19 | 19 | 19 |
| FnsoEm | Pearson Correlation | .060 | .016 | -.197 | .070 | -.072 | -.123 | -.249 | -.143 | 1 |
| Sig. (1-tailed) | .404 | .474 | .210 | .389 | .384 | .307 | .152 | .280 |  |
| N | 19 | 19 | 19 | 19 | 19 | 19 | 19 | 19 | 19 |
| **. Correlation is significant at the 0.01 level (1-tailed). | | | | | | | | | | |
| *. Correlation is significant at the 0.05 level (1-tailed). | | | | | | | | | | |
