# Supplementary material for: Chemical Variation and Implications on Repellecy Activity of Tephrosia vogelii (Hook f.) Essential Oils Against Sitophilus zeamais Motschulsky
Source: Preprints.org preprint supplement (doi:10.20944/preprints202002.0278.v1), 2020-02-19
Supplement: Supplementary file 2 [file Chemical variability.xlsx]

## Sheet: O-xylene calibration curve
					o-Xylene
				Av. RT	5.551
		Concn (ppb)	Peak area
		10	99500000						Sample	Peak area	Concn (ppb)	Concn
		20	165200000						Tv1kyc	434300000	52.43
		40	360100000						TV1muya	11510000	10.151
		87.8	1105000000						Tv1kya
									Tv1kyb
									Tv2muya
									Tv2kya
									Tv2kyb
									Tv2kyc
									Tv2kyd
									Tv3muya
									Tv3muyb
									Tv3muyc
									Tv3kya
									Tv4muya
									Tv4muyb
									Tv4muyc
									Tv4kya
									Tv4kyb
									Tv4kyc

## Sheet: m-xylene
					m-Xylene
				AV. RT	4.901
	Concn (ppb)	Peak area
	1	3162000
	5	14130000							Sample	Peak area	Concn (ppb)
	10	39160000							Tv1kyc	252400000	52.28
	20	104200000							TV1muya	5208000	2.8416
									Tv1kya	47220000	11.244
									Tv1kyb	296600000	61.12
									Tv2muya	2024000000	406.6
									Tv2kya	90470000	19.894
									Tv2kyb	181500000	38.1
									Tv2kyc	440800000	89.96
									Tv2kyd	212400000	44.28
									Tv3muya
									Tv3muyb
									Tv3muyc
									Tv3kya
									Tv4muya
									Tv4muyb
									Tv4muyc
									Tv4kya
									Tv4kyb
									Tv4kyc

## Sheet: Ethylbenzene calibration curve
				Ethylbenzene
			AV. RT	4.825
Concn(ppb)	Peak area
1	4492000									Sample	Peak area	Concn (ppb)
5	34920000									Tv1kyc	137300000	8.865
10	79430000									TV1muya	2555000	2.12775
20	320600000									Tv1kya
										Tv1kyb
										Tv2muya
										Tv2kya
										Tv2kyb
										Tv2kyc
										Tv2kyd
										Tv3muya
										Tv3muyb
										Tv3muyc
										Tv3kya
										Tv4muya
										Tv4muyb
										Tv4muyc
										Tv4kya
										Tv4kyb
										Tv4kyc

## Sheet: (±)-Limonene calibration
					(±)-Limonene
				AV. RT	10.363
		Concn	Peak area	RT
		1ppb	5948000	10.384						Sample	Peak area	Concn (ppb)	cpd
		5ppb	28570000	10.349						Tv1kyc	25120000	1.628	D-limonene
		10ppb	90440000	10.355						TV1muya	24730000	1.61825	D-limonene
										Tv1kya	16160000	1.404
										Tv1kyb	22310000	1.55775
										Tv2muya
										Tv2kya
										Tv2kyb
										Tv2kyc
										Tv2kyd
										Tv3muya
										Tv3muyb
										Tv3muyc
										Tv3kya
										Tv4muya
										Tv4muyb
										Tv4muyc
										Tv4kya
										Tv4kyb
										Tv4kyc
										TD

## Sheet: α-pinene calibration
				α-Pinene
			Average RT	6.713
	Concn	Area peak
	5	39870000								Sample	Peak area	Concn (ppb)	cpd
	10	71340000								Tv1kyc
	20	173300000								TV1muya	89920000	11.992
	85.8	874900000								Tv1kya	160600000	19.06
										Tv1kyb	89290000	11.929
										Tv2muya	40320000	7.032
										Tv2kya	5778000	3.5778
										Tv2kyb
										Tv2kyc
										Tv2kyd
										Tv3muya
										Tv3muyb
										Tv3muyc
										Tv3kya
										Tv4muya
										Tv4muyb
										Tv4muyc
										Tv4kya
										Tv4kyb
										Tv4kyc
										TD

## Sheet: α-terpineol calibration
					α-Terpineol
				Av. RT	17.853
	Concn	Area peak								Sample	Peak area	Concn (ppb)
	5	4354000								Tv1kyc
	10	11900000								TV1muya
	20	36720000								Tv1kya
	93.4	159400000								Tv1kyb
										Tv2muya	28480000	15.74
										Tv2kya	17470000	10.235
										Tv2kyb	21010000	12.005
										Tv2kyc	14910000	8.955
										Tv2kyd	22110000	12.555
										Tv3muya	17230000	10.115
										Tv3muyb	21420000	12.21
										Tv3muyc	14700000	8.85
										Tv3kya	24750000	13.875
										Tv4muya	22120000	12.56
										Tv4muyb	986000	1.993
										Tv4muyc	324000	1.662
										Tv4kya
										Tv4kyb
										Tv4kyc

## Sheet: (±)-linalool standard cal
						(±)-Linalool
					AV. RT	13.470
	Concn	Area peak							Sample	Peak area	Concn (ppb)
	5	14000000							Tv1kyc
	10	34960000							TV1muya
	20	90120000							Tv1kya
	86.1	373700000							Tv1kyb
									Tv2muya	66020000	18.005
									Tv2kya	373700000	94.925
									Tv2kyb
									Tv2kyc
									Tv2kyd
									Tv3muya
									Tv3muyb
									Tv3muyc
									Tv3kya
									Tv4muya
									Tv4muyb
									Tv4muyc
									Tv4kya
									Tv4kyb
									Tv4kyc

## Sheet: Decane
					Decane
				AV. RT	9.191
	Concn	Area peak							Sample	Peak area	Concn (ppb)
	5	39630000							Tv1kyc
	10	76180000							TV1muya
	20	132500000							Tv1kya
	72.9	571400000							Tv1kyb
									Tv2muya	117100000	15.6375
									Tv2kya	54210000	7.77625
									Tv2kyb	9600000	2.2
									Tv2kyc	29920000	4.74
									Tv2kyd	23660000	3.9575
									Tv3muya	37540000	5.6925
									Tv3muyb	52010000	7.50125
									Tv3muyc	11210000	2.40125
									Tv3kya	39430000	5.92875
									Tv4muya
									Tv4muyb
									Tv4muyc
									Tv4kya
									Tv4kyb
									Tv4kyc

## Sheet: pCymene
					p-Cymene
				Av. RT	10.146
	Concn	Area peak
	5	29120000								Sample	Peak area	Concn (ppb)
	10	51360000								Tv1kyc
	20	102100000								TV1muya
	85.7	553300000								Tv1kya
										Tv1kyb
										Tv2muya
										Tv2kya
										Tv2kyb
										Tv2kyc
										Tv2kyd
										Tv3muya
										Tv3muyb
										Tv3muyc
										Tv3kya
										Tv4muya
										Tv4muyb
										Tv4muyc
										Tv4kya
										Tv4kyb
										Tv4kyc

## Sheet: 2-undecanone
2						2-Undecanone
					Av. RT	22.282
	Concn	Area peak
	5	16940000							Sample	Peak area	Concn (ppb)
	10	38260000							Tv1kyc
	20	73230000							TV1muya
									Tv1kya
									Tv1kyb	10010000	2.63875
									Tv2muya	43130000	10.9187
									Tv2kya	4564000	1.27725
									Tv2kyb	11200000	2.93625
									Tv2kyc	19020000	4.89125
									Tv2kyd	38300000	9.71125
									Tv3muya	45340000	11.4712
									Tv3muyb	10210000	2.68875
									Tv3muyc	22110000	5.66375
									Tv3kya	42310000	10.7137
									Tv4muya	12100000	3.16125
									Tv4muyb
									Tv4muyc
									Tv4kya
									Tv4kyb
									Tv4kyc

[truncated: 48 more sheets: UNDECANOIC ACID, Beta farnesene, Trans Farnesol , Recovery, Tv1muya, Tv1kya, Tv1kyb, Tv1Kyc, Tv2Muya, Tv2kya, Tv2kyb, Tv2Kyc, Tv2Kyd, Tv3muya, Tv3muyb, Tv3muyc, Tv3Kya, Tv4muya, Tv4muyb, Tv4Muyc …]
